# Supplementary material for: Infinitene as two fused helicoidal trails of fused rings: evaluation of the magnetic behavior of [12]infinitene and anionic species displaying global aromaticity and antiaromaticity
Source: Royal Society of Chemistry journal article supplement (doi:10.1039/d2cp06039f), 2023-01-01
Supplement: d2cp06039f1.pdf [file d2cp06039f1.pdf]

## **Infinite as a Two Fused Helicoidal Trails of Local-Aromatic rings. Evaluation of Magnetic behavior of [12]Infinite and Anionic Species**

Carolina Olea Ulloa,<sup>a</sup> Alvaro Muñoz-Castro<sup>b,\*</sup>

<sup>a</sup>*Carrera de Química y Farmacia, Facultad de Ciencias de la Salud, Universidad Autónoma de Chile, Pedro de Valdivia 425, Providencia, Santiago, Chile.*

<sup>b</sup>*Facultad de Ingeniería, Arquitectura y Diseño, Universidad San Sebastián, Bellavista 7, Santiago, 8420524, Chile. E-mail: alvaro.munozc@uss.cl*

### Content

Figure S1. Graphical representation of the shielding tensor for [12]Infinite. **Page S2**

Table S1. Calculated isotropic chemical shielding tensor ( $\delta$ ) related parameters. **Page S3**

Table S2. NICS(0) values in ppm for the rings: A, B, and C, and at the middle of the central C-C $\cdots$ C-C cross-section, at the center of the stacked six-membered rings, and at the center of a representative helical axis, for the different charge states (q) at different levels of theory. In addition, HOMO-LUMO gap (HL) values are given in eV. **Page S4**

Figure S2. Three-dimensional representation of NICS and the z-component of the induced magnetic field,  $B_z^{\text{ind}}$  for **1**, [12]Infinite, and charged species. For  $B_z^{\text{ind}}$ , the external field is aligned to the z-axis, which is taken to be parallel to the helicoidal axis. at different values of isosurfaces given by:  $\pm 5$ ,  $\pm 10$ ,  $\pm 15$ ,  $\pm 20$ , and,  $\pm 30$  ppm, showing shielding (blue) and deshielding (red) regions. **Page S5**

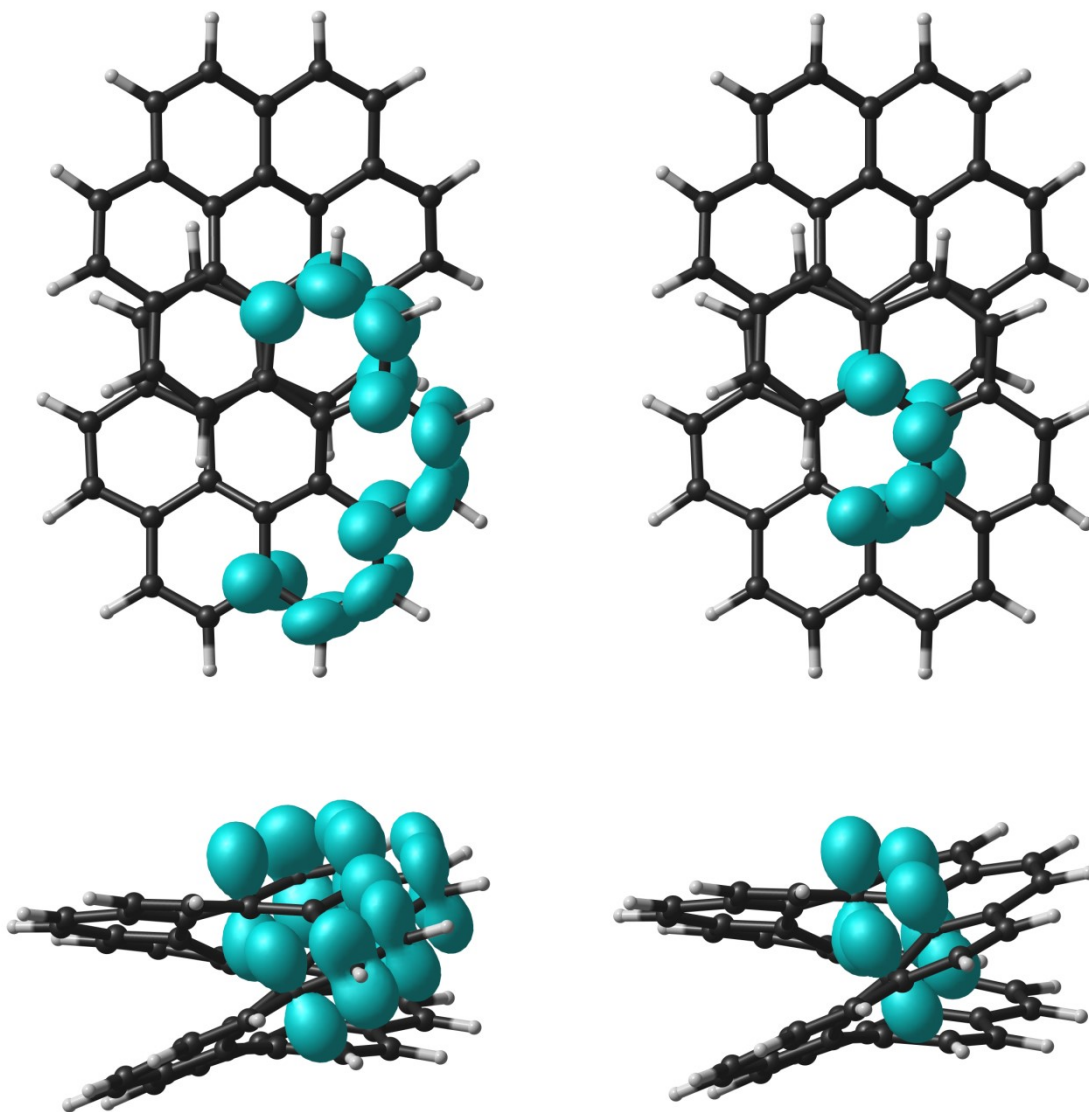

Figure S1. Graphical representation of the shielding tensors for [12]Infiniteene in two views.

Table S1. Calculated isotropic chemical shielding tensor ( $\delta$ ) and different components of the absolute shielding tensor ( $\sigma_{ii}$ ) according the principal-axis-system (PAS), and related anisotropy ( $\sigma_{\text{aniso}}$ ) and asymmetry ( $\eta$ ) parameters, at several charges ( $q$ ). Values in ppm. C-C means, sp<sup>2</sup>-carbon atoms bonded to carbons. C-H means, sp<sup>2</sup>-carbon atoms bonded to hydrogen. See color code from right figure.

| $q=0$  |     | $\sigma_{11}$ | $\sigma_{22}$ | $\sigma_{33}$ | $\sigma_{\text{iso}}$ | $\delta_{\text{iso}}$ | $\sigma_{\text{aniso}}$ | $\eta$ asym |
|--------|-----|---------------|---------------|---------------|-----------------------|-----------------------|-------------------------|-------------|
| 1      | C-C | -4.2          | 4.6           | 185.5         | 62.0                  | 130.6                 | 185.3                   | 0.07        |
| 6      | C-C | -5.5          | -0.2          | 191.7         | 62.0                  | 130.5                 | 194.5                   | 0.04        |
| 4      | C-C | -5.3          | 3.4           | 187.8         | 62.0                  | 130.5                 | 188.7                   | 0.07        |
| 7      | C-C | -12.2         | 5.2           | 193.7         | 62.2                  | 130.3                 | 197.2                   | 0.13        |
| 5      | C-C | -0.7          | 6.9           | 186.3         | 64.2                  | 128.4                 | 183.1                   | 0.06        |
| 2      | C-C | 2.0           | 12.9          | 179.2         | 64.7                  | 127.8                 | 171.7                   | 0.10        |
| 9      | C-H | -24.7         | 65.7          | 155.7         | 65.5                  | 127.0                 | 135.2                   | 1.00        |
| 3      | C-C | 1.1           | 13.2          | 183.4         | 65.9                  | 126.6                 | 176.2                   | 0.10        |
| 8      | C-H | -21.5         | 67.4          | 154.2         | 66.7                  | 125.8                 | 131.3                   | 1.02        |
| 11     | C-H | -24.3         | 64.9          | 161.5         | 67.4                  | 125.2                 | 141.2                   | 0.95        |
| 10     | C-H | -20.5         | 67.4          | 156.1         | 67.7                  | 124.9                 | 132.6                   | 0.99        |
| 13     | C-H | -30.4         | 61.0          | 179.0         | 69.9                  | 122.7                 | 163.8                   | 0.84        |
| 12     | C-H | -16.6         | 70.4          | 163.0         | 72.3                  | 120.3                 | 136.1                   | 0.96        |
| $q=-2$ |     |               |               |               |                       |                       |                         |             |
| 4      | C-C | -61.3         | 7.5           | 131.4         | 25.9                  | 166.6                 | 158.3                   | 0.65        |
| 1      | C-C | -76.9         | -1.3          | 160.8         | 27.5                  | 165.0                 | 200.0                   | 0.57        |
| 6      | C-C | -62.9         | 11.2          | 177.8         | 42.0                  | 150.5                 | 203.7                   | 0.55        |
| 3      | C-C | -20.0         | 10.1          | 168.0         | 52.7                  | 139.8                 | 173.0                   | 0.26        |
| 13     | C-H | -15.3         | 12.3          | 181.4         | 59.5                  | 133.0                 | 183.0                   | 0.23        |
| 7      | C-C | -32.9         | -7.4          | 222.2         | 60.7                  | 131.8                 | 242.3                   | 0.16        |
| 12     | C-H | -44.0         | 82.3          | 149.8         | 62.7                  | 129.8                 | 130.7                   | 1.45        |
| 11     | C-H | -10.8         | 83.2          | 144.5         | 72.3                  | 120.2                 | 108.3                   | 1.30        |
| 10     | C-H | -27.5         | 83.6          | 182.7         | 79.6                  | 112.9                 | 154.7                   | 1.08        |
| 8      | C-H | -23.4         | 90.7          | 172.3         | 79.9                  | 112.6                 | 138.6                   | 1.24        |
| 9      | C-H | -8.0          | 82.6          | 179.5         | 84.7                  | 107.8                 | 142.2                   | 0.95        |
| 5      | C-C | 8.9           | 66.8          | 186.9         | 87.5                  | 105.0                 | 149.1                   | 0.58        |
| 2      | C-C | 34.8          | 51.3          | 190.7         | 92.3                  | 100.2                 | 147.6                   | 0.17        |
| $q=-4$ |     |               |               |               |                       |                       |                         |             |
| 1      | C-C | -6.4          | -4.8          | 179.1         | 56.0                  | 136.5                 | 184.7                   | 0.01        |
| 4      | C-C | -3.8          | 19.5          | 177.5         | 64.4                  | 128.1                 | 169.7                   | 0.21        |
| 13     | C-H | -20.2         | 29.3          | 200.3         | 69.8                  | 122.7                 | 195.8                   | 0.38        |
| 2      | C-C | 23.5          | 29.3          | 171.2         | 74.6                  | 117.9                 | 144.9                   | 0.06        |
| 7      | C-C | -14.8         | 44.4          | 199.0         | 76.2                  | 116.3                 | 184.3                   | 0.48        |
| 6      | C-C | 1.6           | 39.2          | 203.1         | 81.3                  | 111.2                 | 182.7                   | 0.31        |
| 5      | C-C | 8.4           | 50.1          | 186.2         | 81.6                  | 110.9                 | 156.9                   | 0.40        |
| 3      | C-C | 20.2          | 40.9          | 183.7         | 81.6                  | 110.9                 | 153.2                   | 0.20        |
| 8      | C-H | 10.9          | 97.5          | 137.1         | 81.9                  | 110.6                 | 82.8                    | 1.57        |
| 11     | C-H | -10.6         | 110.1         | 147.5         | 82.4                  | 110.1                 | 97.8                    | 1.85        |
| 10     | C-H | 16.0          | 94.4          | 143.3         | 84.6                  | 107.9                 | 88.1                    | 1.33        |
| 9      | C-H | 12.8          | 117.2         | 133.9         | 88.0                  | 104.5                 | 68.9                    | 2.27        |
| 12     | C-H | 12.7          | 105.0         | 160.0         | 92.5                  | 100.0                 | 101.2                   | 1.37        |

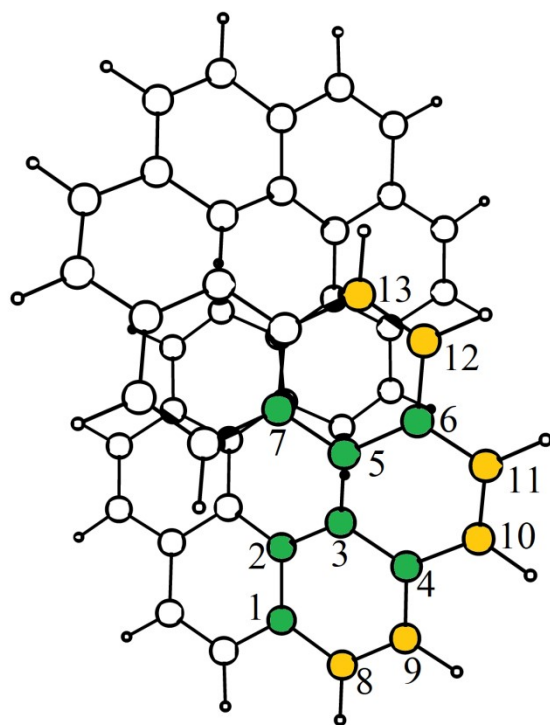

Table S2. NICS(0) values in ppm for the rings: A, B, and C, and at the middle of the central C-C...C-C cross-section, at the center of the stacked six-membered rings, and at the center of a representative helical axis, for the different charge states (q) at different levels of theory. In addition, HOMO-LUMO gap (HL) values are given in eV.

| <b>q=0</b>  | A    | B     | C     | Cross-section | Inter-ring | Helical axis | HL   |
|-------------|------|-------|-------|---------------|------------|--------------|------|
| BP86        | -5.3 | -6.6  | -6.8  | -10.9         | -9.3       | 6.0          | 2.05 |
| PBE         | -5.2 | -6.6  | -6.7  | -10.9         | -9.3       | 6.0          | 2.05 |
| OPBE        | -5.6 | -6.9  | -7.1  | -11.0         | -9.5       | 6.1          | 2.09 |
| PBE0        | -4.9 | -6.3  | -6.2  | -10.4         | -8.9       | 7.1          | 3.43 |
| <b>q=-2</b> |      |       |       |               |            |              |      |
| BP86        | 11.6 | 14.4  | 11.5  | 15.5          | 4.6        | -37.2        | 0.20 |
| PBE         | 11.9 | 14.6  | 11.6  | 15.5          | 4.6        | -37.3        | 0.20 |
| OPBE        | 12.4 | 14.7  | 11.0  | 15.0          | 4.1        | -37.7        | 0.20 |
| PBE0        | 11.7 | 16.3  | 15.0  | 21.6          | 8.1        | -42.6        | 1.09 |
| <b>q=-4</b> |      |       |       |               |            |              |      |
| BP86        | -1.1 | -10.7 | -13.0 | -21.2         | -16.7      | 2.0          | 0.22 |
| PBE         | 0.3  | -8.5  | -11.2 | -19.3         | -15.2      | -1.7         | 0.07 |
| OPBE        | -0.5 | -10.8 | -12.9 | -21.3         | -16.4      | 2.3          | 0.12 |
| PBE0        | 2.3  | -9.9  | -14.1 | -27.6         | -20.4      | -1.8         | 0.91 |

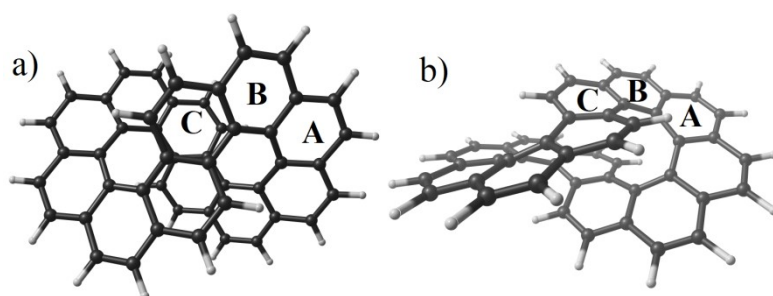

Up (a) and side (b) views of the calculated structure for [12]Helicene. Three different types of six membered rings are denoted as A, B, and C,

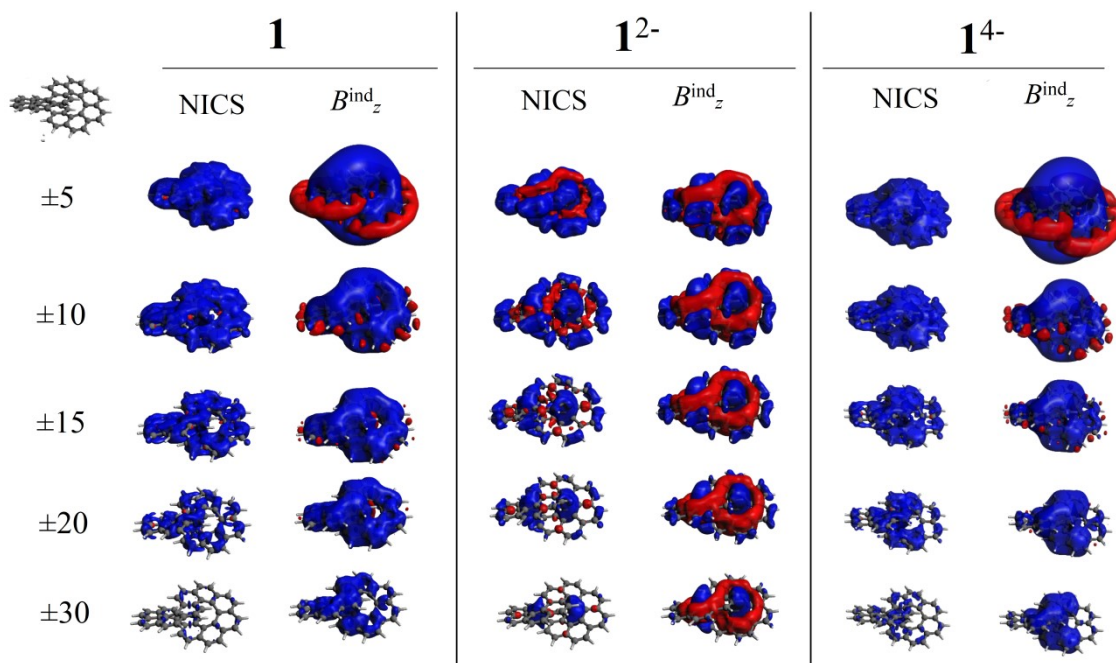

Figure S2. Three-dimensional representation of NICS and the z-component of the induced magnetic field,  $B_z^{\text{ind}}$  for **1**, [12]Infinite, and charged species. For  $B_z^{\text{ind}}$ , the external field is aligned to the z-axis, which is taken to be parallel to the helicoidal axis. at different values of isosurfaces given by:  $\pm 5$ ,  $\pm 10$ ,  $\pm 15$ ,  $\pm 20$ , and,  $\pm 30$  ppm, showing shielding (blue) and deshielding (red) regions.
